# Supplementary material
Source: PubMed Central journal article supplement (PMC1756905)
Supplement: pgen.0020212.st001.pdf [file pgen.0020212.st001.pdf]

Supplementary Table 1:

Insertion sites of Ty2 elements in RM11 and their insertion points relative to the S288c sequence, based on blast search analysis of the RM11 genome sequence.

| Chromosome | Insertion point in S288c sequence |
|------------|-----------------------------------|
| 2          | 405558                            |
| 4          | 991143                            |
| 6          | 206608                            |
| 7          | 115290                            |
| 7          | 319065                            |
| 7          | 402223                            |
| 8          | 133572                            |
| 8          | Tandem with above                 |
| 11         | 457478                            |
| 12         | 605670                            |
| 13         | 837678                            |
| 14         | 96494                             |
| 16         | 572154                            |
