# Supplementary material
Source: PubMed Central journal article supplement (PMC1756905)
Supplement: pgen.0020212.st002.pdf [file pgen.0020212.st002.pdf]

Supplemental Table 2:

Mapped locations of Ty1 and Ty2 full length elements in SK1, giving range of location where peak relative hybridization signal is >3 x above the background.

Mapped location of Ty3 LTR elements in SK1, giving the position of the nearest tRNA gene, since Ty3 LTRs are known to insert within several bases of the start of a tRNA gene.

| Ty1 and Ty2 coordinates for SK1 | Range of peak signal (>3X signal increase) |     |
|---------------------------------|--------------------------------------------|-----|
| Chr1                            | 181332-182402                              | Ty1 |
| Chr3                            | 148931-151406                              | Ty1 |
|                                 | 173312-176979                              | Ty2 |
| Chr4                            | 973204-994087                              | Ty1 |
|                                 | 1088958-1102355                            | Ty1 |
|                                 | 1147971-1151040                            | Ty1 |
|                                 | 1156272-1163036                            | Ty2 |
| Chr5                            | 77856-82063                                | Ty2 |
|                                 | 106484-117635                              | Ty1 |
|                                 | 438618-449769                              | Ty1 |
| Chr6                            | 131331-147106                              | Ty1 |
| Chr7                            | 73124-78114                                | Ty2 |
|                                 | 433577-447581                              | Ty1 |
|                                 | 543447-548141                              | Ty1 |
|                                 | 785362-799622                              | Ty1 |
| Chr9                            | 337006-338425                              | Ty1 |
| Chr10                           | 193006-206623                              | Ty1 |
| Chr11                           | 296734-304239                              | Ty1 |
|                                 | 572572-581018                              | Ty1 |
| Chr12                           | 788241-797465                              | Ty2 |
| Chr13                           | 502742-512783                              | Ty1 |
| Chr14                           | 95896-106996                               | Ty1 |
| Chr16                           | 334307-343365                              | Ty1 |
|                                 | 770694-782032                              | Ty1 |
|                                 | 843777-859724                              | Ty1 |
|                                 |                                            |     |
| Ty3 LTR                         | Position of nearest tRNA                   |     |
| Chr2                            | 197497-197570                              |     |
| Chr4                            | 1095456-1095365                            |     |
| Chr7                            | 328586-328657                              |     |
|                                 | 876399-876471, 878820-878715               |     |
| Chr9                            | 325746-325818                              |     |
| Chr11                           | 307862-307789, 313117-313046               |     |
| Chr12                           | 427133 -427204                             |     |
|                                 | 687934 -687861                             |     |
| Chr13                           | 321218 -321146                             |     |
| Chr14                           | 602311 -602384                             |     |

|       |        |         |  |
|-------|--------|---------|--|
| Chr15 | 976416 | -976488 |  |
| Chr16 | 622628 | -622537 |  |
|       | 689562 | -689643 |  |
|       | 744282 | -744353 |  |
